# Supplementary material
Source: PubMed Central journal article supplement (PMC5798949)
Supplement: krnb-15-02-1408766-s001.pdf [file krnb-15-02-1408766-s001.pdf]

## Supplementary materials

### Truncated forms of U2 snRNA (U2-tfs) are shunted toward a novel uridylylation pathway that differs from the degradation pathway for U1-tfs

Hideaki Ishikawa<sup>1, 2</sup>, Yuko Nobe<sup>3</sup>, Keiichi Izumikawa<sup>1, 2</sup>, Masato Taoka<sup>3</sup>, Yoshio Yamauchi<sup>3</sup>, Hiroshi Nakayama<sup>4</sup>, Richard J Simpson<sup>2, 5</sup>, Toshiaki Isobe<sup>3</sup> and Nobuhiro Takahash<sup>1, 2\*</sup>

<sup>1</sup>Department of Applied Biological Science, Graduate School of Agriculture, Tokyo University of Agriculture and Technology, 3-5-8 Saiwai-cho, Fuchu-shi, Tokyo 183-8509, Japan, <sup>2</sup>Global Innovation Research Organization, Tokyo University of Agriculture and Technology, 3-5-8 Saiwai-Cho, Fuchu-Shi, Tokyo 183-8509, Japan, <sup>3</sup>Department of Chemistry, Graduate School of Sciences and Engineering, Tokyo Metropolitan University, 1-1 Minamiosawa, Hachioji-shi, Tokyo 192-0397, Japan, <sup>4</sup>Biomolecular Characterization Team, RIKEN Advanced Science Institute, 2-1, Hirosawa, Wako, Saitama 351-0198, Japan, <sup>5</sup>La Trobe Institute for Molecular Science (LIMS) LIMS Building 1, Room 412 La Trobe University, Bundoora Victoria 3086, Australia

## MATERIAL AND METHODS

*Reagents and antibodies*—Antibodies used are listed in Supplementary Table S5. All reagents used in this study were purchased from Wako pure chemical (Japan), Kanto Chemical (Japan) or Nakalai Tesque (Japan).

*Cell culture and transfection*—HEK293T and Flp-In T-REx-293 cells were maintained according to standard methods in Dulbecco's modified Eagle's medium (DMEM; Sigma-Aldrich, Tokyo, Japan) supplemented with 10% heat-inactivated fetal calf serum in a humidified atmosphere of 95% air and 5% CO<sub>2</sub><sup>1</sup>. Transfection was performed by lipofection method<sup>1</sup>. Lipofection method was performed with Lipofectamine 2000 or Lipofectamine RNAiMAX reagent according to manufacturer's protocol (Thermo Fisher Scientific).

*Construction of RAT RNA tag only expression vector*—Annealed primer set of HIW394 and HIW395 (Supplementary Table S4) that contained pol III terminator sequence was cut at *Cla* I / *Eco*R I sites and ligated into the same sites as those in pRcU6PT7SK<sup>2</sup>; 7SK sequence present at the downstream of the RAT RNA tag sequence was replaced by terminator sequence and produces pRcU6PT vector that encodes only RAT tag RNA.

*RNA interference*—Stealth siRNA or Silencer Select siRNA (siRNA/scRNA/control RNA; Thermo Fisher Scientific) (Supplementary Table S6) transfection was performed using Lipofectamine RNAiMAX according to manufacture's protocol (Life Technologies)<sup>3</sup>.

*Construction of vectors expressing HEF/HF (HEF: FLAG-TEV-HA, HF: FLAG-HA) tagged proteins and cell lines expressing HEF/HF-proteins inducibly with doxycycline*—Constructions of all vectors expressing HEF/HF-tagged proteins except enzyme-dead Dis3L2 are described previously<sup>1</sup>. To construct pcDNA5-FRT/TO vector expressing C-terminal epitope tagged enzyme-dead Dis3L2, we started first cutting pcDNA3.1(+)-C-terminal-HEF plasmid<sup>1</sup> with *Hind* III / *Xho* I to obtain epitope tag coding fragment and ligated the digest into *Hind* III / *Xho* I sites of pcDNA5-FRT/TO vector and named this vector as pcDNA5-FRT/TO-HEFc. A cDNA fragment encoding Dis3L2 (NM\_152383), on the other hand, was obtained by PCR using primer set HIW561 and HIW562 (Supplementary Table S4) using the first strand DNAs as templates that were prepared by RT reaction of total RNA extracted from 293T cells. The PCR product was cut with *Bam*H I / *Sma* I, ligated into *Bam*H I / *Eco*R V sites of pcDNA5-FRT/TO-HEFc vector prepared above, verified by DNA sequencing and used for further mutant construction. The vector expressing a Dis3L2 enzyme-dead mutant, in which a conserved catalytic residue, aspartic acid (D391) was replaced by asparagine (Dis3L2-D391N) by site directed PCR mutagenesis using primer set HIW591 and HIW592 (Supplementary Table S4)<sup>4,5</sup>. The PCR product was subjected to *Dpn* I (methylation specific restriction endonuclease) digestion for removing template, and used in *E. coli* transformation to obtain clonal plasmid (pcDNA5-FRT/TO-Dis3L2-D391N-HEFc). The doxycycline inducible cells expressing Dis3L2-D391N-HEF were obtained by co-transfection of pcDNA5-FRT/TO-Dis3L2-D391N-HEFc with pOG44 vector into Flp-In T-REx-293 cells and selected as described<sup>1</sup>.

*General procedures for RNA and protein analyses*—Total RNA extraction was performed with TRIzol reagent (Thermo Fisher Scientific) according to manufacturer's protocol. Other RNA experiments including RNA extraction from Pull-downed ribonucleoprotein (RNP) complex, Urea-PAGE followed by northern blotting, RNA-MS analyses were performed as described by Ishikawa et al.<sup>1</sup>. Protein analysis of SDS-PAGE followed by western blotting was also performed with modification of the methods described by Ishikawa et al.<sup>1</sup>; briefly, combination of alkaline phosphatase-NBT/BCIP detection method was changed

to HRP based detection method; accordingly, HRP-conjugated antibodies were used for secondary antibodies in western blotting (Supplementary Table S5), and Clarity™ Western ECL substrate or Clarity Max™ Western ECL substrate for detection. Chemiluminescence was detected with LAS4000 luminescent image analyzer (FUJI FILM) and stained band was quantified with ImageJ (NIH: open source, public domain) software.

1. Ishikawa H, Nobe Y, Izumikawa K, Yoshikawa H, Miyazawa N, Terukina G, Kurokawa N, Taoka M, Yamauchi Y, Nakayama H, et al. Identification of truncated forms of U1 snRNA reveals a novel RNA degradation pathway during snRNP biogenesis. *Nucleic Acids Res* 2014; 42:2708-24; PMID: 24311566; <https://doi.org/10.1093/nar/gkt1271>
2. Hogg JR, Collins K. RNA-based affinity purification reveals 7SK RNPs with distinct composition and regulation. *Rna* 2007; 13:868-80; PMID: 17456562; <https://doi.org/10.1261/rna.565207>
3. Izumikawa K, Yoshikawa H, Ishikawa H, Nobe Y, Yamauchi Y, Philipsen S, Simpson RJ, Isobe T, Takahashi N. Chtop (Chromatin target of Prmt1) auto-regulates its expression level via intron retention and nonsense-mediated decay of its own mRNA. *Nucleic Acids Res* 2016; 44:9847-9859; PMID: 27683223; <https://doi.org/10.1093/nar/gkw831>
4. Lubas M, Damgaard CK, Tomecki R, Cysewski D, Jensen TH, Dziembowski A. Exonuclease hDIS3L2 specifies an exosome-independent 3'-5' degradation pathway of human cytoplasmic mRNA. *EMBO J* 2013; 32:1855-68; PMID: 23756462; <https://doi.org/10.1038/emboj.2013.135>
5. Ustianenko D, Hrossova D, Potesil D, Chalupnikova K, Hrazdilova K, Pachernik J, Cetkovska K, Uldrijan S, Zdrahal Z, Vanacova S. Mammalian DIS3L2 exoribonuclease targets the uridylated precursors of let-7 miRNAs. *RNA* 2013; 19:1632-8; PMID: 24141620; <https://doi.org/10.1261/rna.040055.113>

## Supplementary Figure Legends

### Supplementary Figure S1 Reverse-phase LC separation of the RNase T1 digest of U2-tfsL or U2-tfs

(A) Gemin5-HEF (hemagglutinin/TEV protease/FLAG tag)- or HEF-associated RNAs pulled down with anti-FLAG antibody-fixed beads were stained with SYBR Gold after Urea-PAGE separation. Sizes of RNA markers (Base) are shown at

left. Boxed areas were excised and analyzed by LC/MS. (B) Effluent was monitored at  $m/z=917.09$  ( $m^7G$ -capped AUCGp + one methyl residue, MMG-1m; top) or  $m/z=924.10$  ( $m^7G$ -capped AUCGp + two methyl residues, MMG-2m; bottom). MMG-1m and MMG-2m are present in both the U2-tfsL and U2-tfs digests.

### **Supplementary Figure S2 Construction of vectors expressing y18Sn-tagged U2**

(A) Experimental scheme for the U2 gene construct expressing y18Sn-tagged U2 snRNA. The cleavage sites for the restriction enzymes used and the regions amplified by PCR, are shown. (B) Nucleotide sequence of the U2 gene construct (based on Homo sapiens chromosome 17, GRCh38.p7 Primary Assembly, NC\_000017.11, Range: 43232907 to 43234977). Red text shows matured U2 sequence, magenta a sequence of Oct, light green a sequence of PSE and blue a sequence of 3' box. An extra sequence corresponding to the first 11 nucleotides at the 5' end of U2 (ATCGCTTCTCG, U2-5' in (A), the y18Sn tag sequence (blue background CGAGGATTCAGGCTTTGG), Bgl II recognition sequence (AGATCT) and Cla I recognition sequence (ATCGAT) are underlined. (C) Total RNA extracted from cells expressing y18Sn-U2 or y18Sn-U1 was analyzed by northern blotting using the probe for y18Sn. (D) Schematic secondary structure for the U2 mutants expected to be produced from the short U2 gene constructs (with or without the 3' box) lacking the SmSL3SL4 region (U2- $\Delta$ SmSL3SL4), Sm (U2- $\Delta$ Sm), SL3 (U2- $\Delta$ SL3), SL4 (U2- $\Delta$ SL4), or SL3SL4 (U2- $\Delta$ SLSL4). Those constructs contain the region containing the 190-nt sequence upstream of the Oct and the 229-nt sequence downstream of the 3' box in the sequence shown in Supplementary Fig. S2B. (E) RNA extracted from cells expressing U2 gene [y18Sn-U2 (2086 bp)] and short U2 gene [y18Sn-U2 (908 bp)] constructs shown was analyzed by northern blotting using the probes shown to the left of the blot. A long-exposure image is shown for probe y18Sn. The U2 gene construct lacking a cis-element (y18Sn-U2- $\Delta$ Oct, y18Sn-U2- $\Delta$ PSE, y18Sn-U2- $\Delta$ 3' box) were prepared from the short U2 gene construct. The RAT tag was used for expression control.

### **Supplementary Figure S3 Reciprocal effects of SmB/B' and TUT7 on the cellular level of U2-tfs/U2-tfs-polyU**

(A) Deficiency of TUT4 does not affect the level of U2-tfs/U2-tfs-polyU. RNA extracted from cells at 48 h and 72 h post-transfection with Silencer Select siRNA (+) or Silencer Select Negative Control siRNA (-) for knockdown of SmB/B', Dis3L2, or TUT4, or a combination of these siRNAs was analyzed by northern blotting using probes shown to the left (lower panel). Protein was

analyzed by immunoblotting (IB) with antibodies against the proteins shown to the left (upper panel). (B) Deficiency of TUT7 increases the level of U2-tfs. RNA extracted from cells at 72 h post-transfection with Silencer Select siRNA (+) or Silencer Select Negative Control siRNA (-) for knockdown of SmB/B', Dis3L2, or TUT7, or a combination of these siRNAs was analyzed by northern blotting using probes shown to the left (lower panel). Stained bands corresponding to U2-tfs and U2-tfs-polyU are shown to the right. Proteins were analyzed by immunoblotting with antibodies against the proteins shown to the left (upper panel). (C) HEF-SmB/B' or snurportin (SPN1)-HF was pulled down and analyzed by immunoblotting (IB) with the antibody against the corresponding protein indicated at left (upper left), or by northern blotting with the probe indicated at left (right). SYBR gold staining of RNAs pulled down by HEF-SmB/B' or SPN1-HF are shown (lower left).

# Supplementary Figure S1

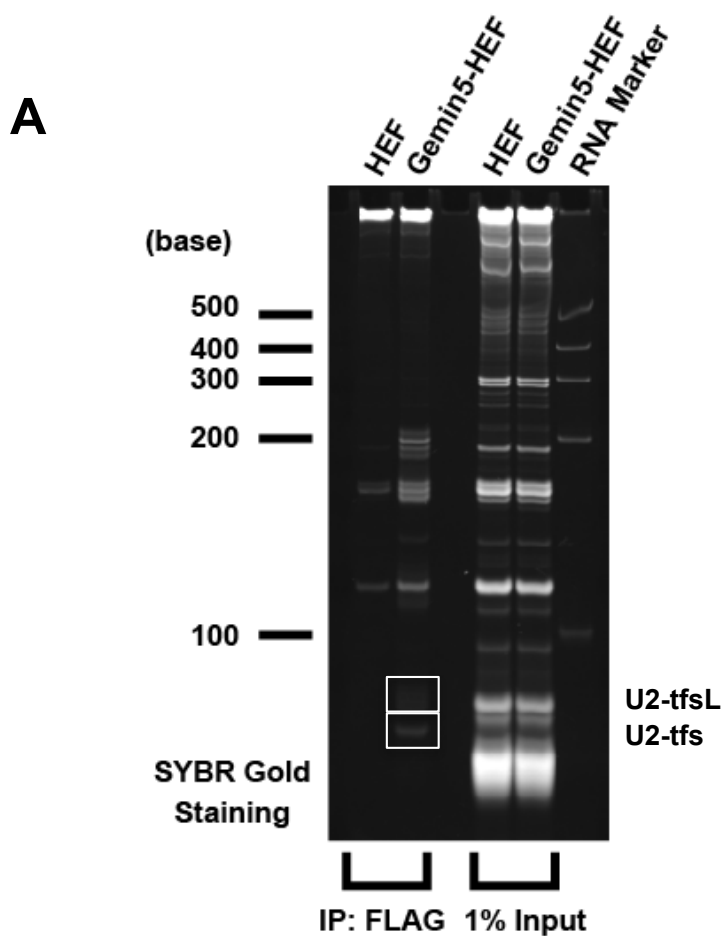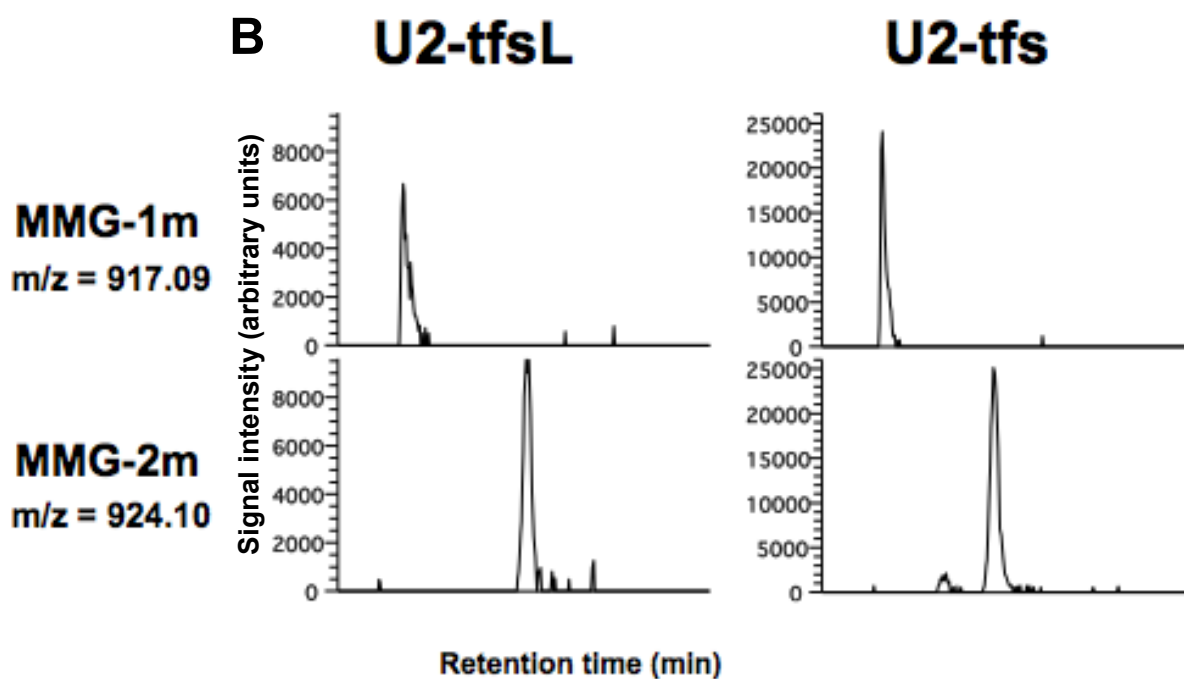



# Supplementary Figure S2

**C**

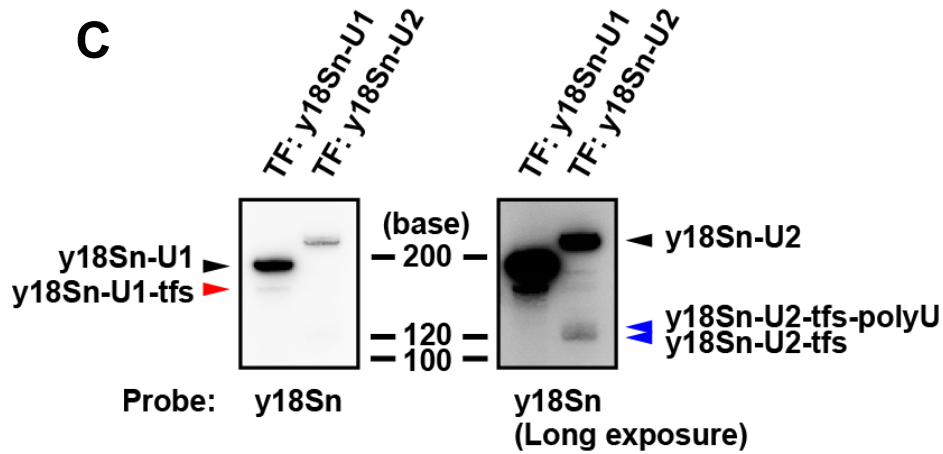

**D**

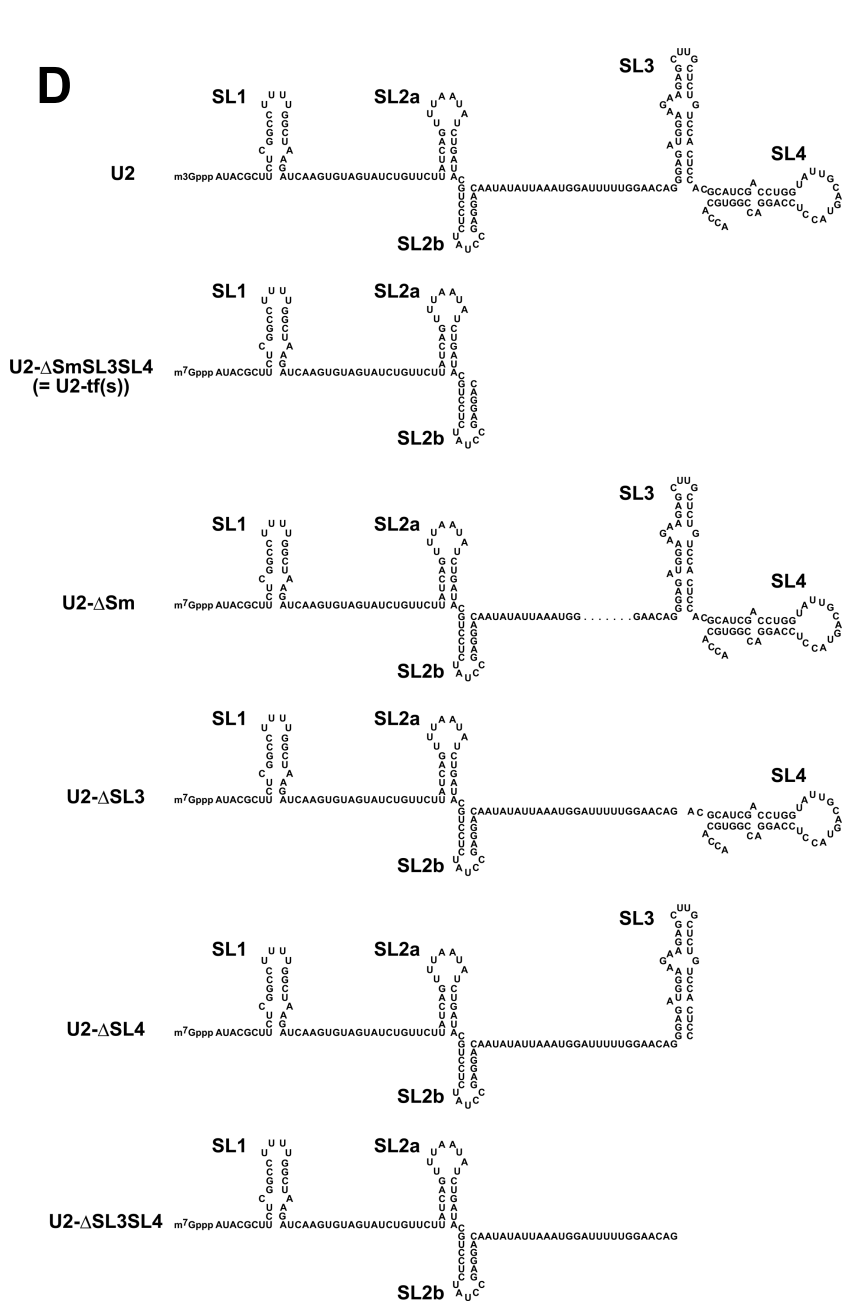

**E**

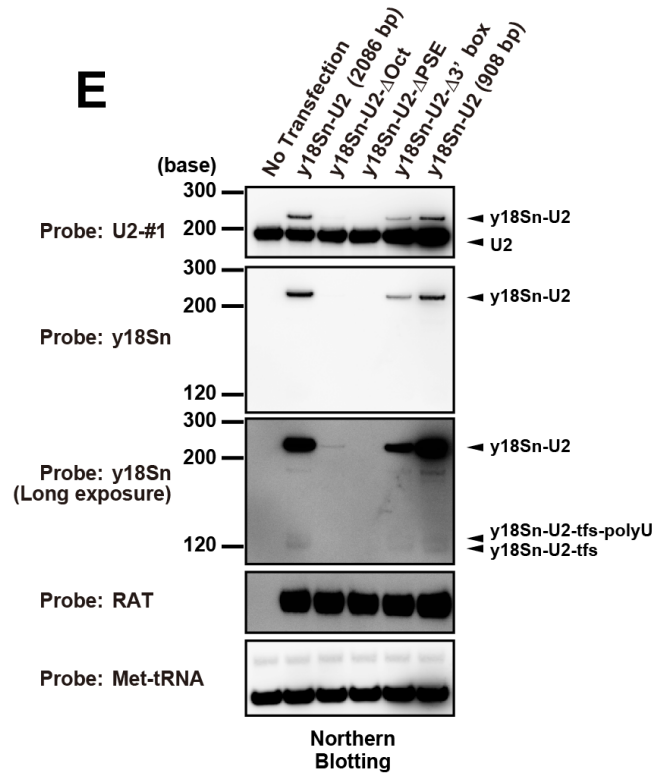



# Supplementary Figure S3

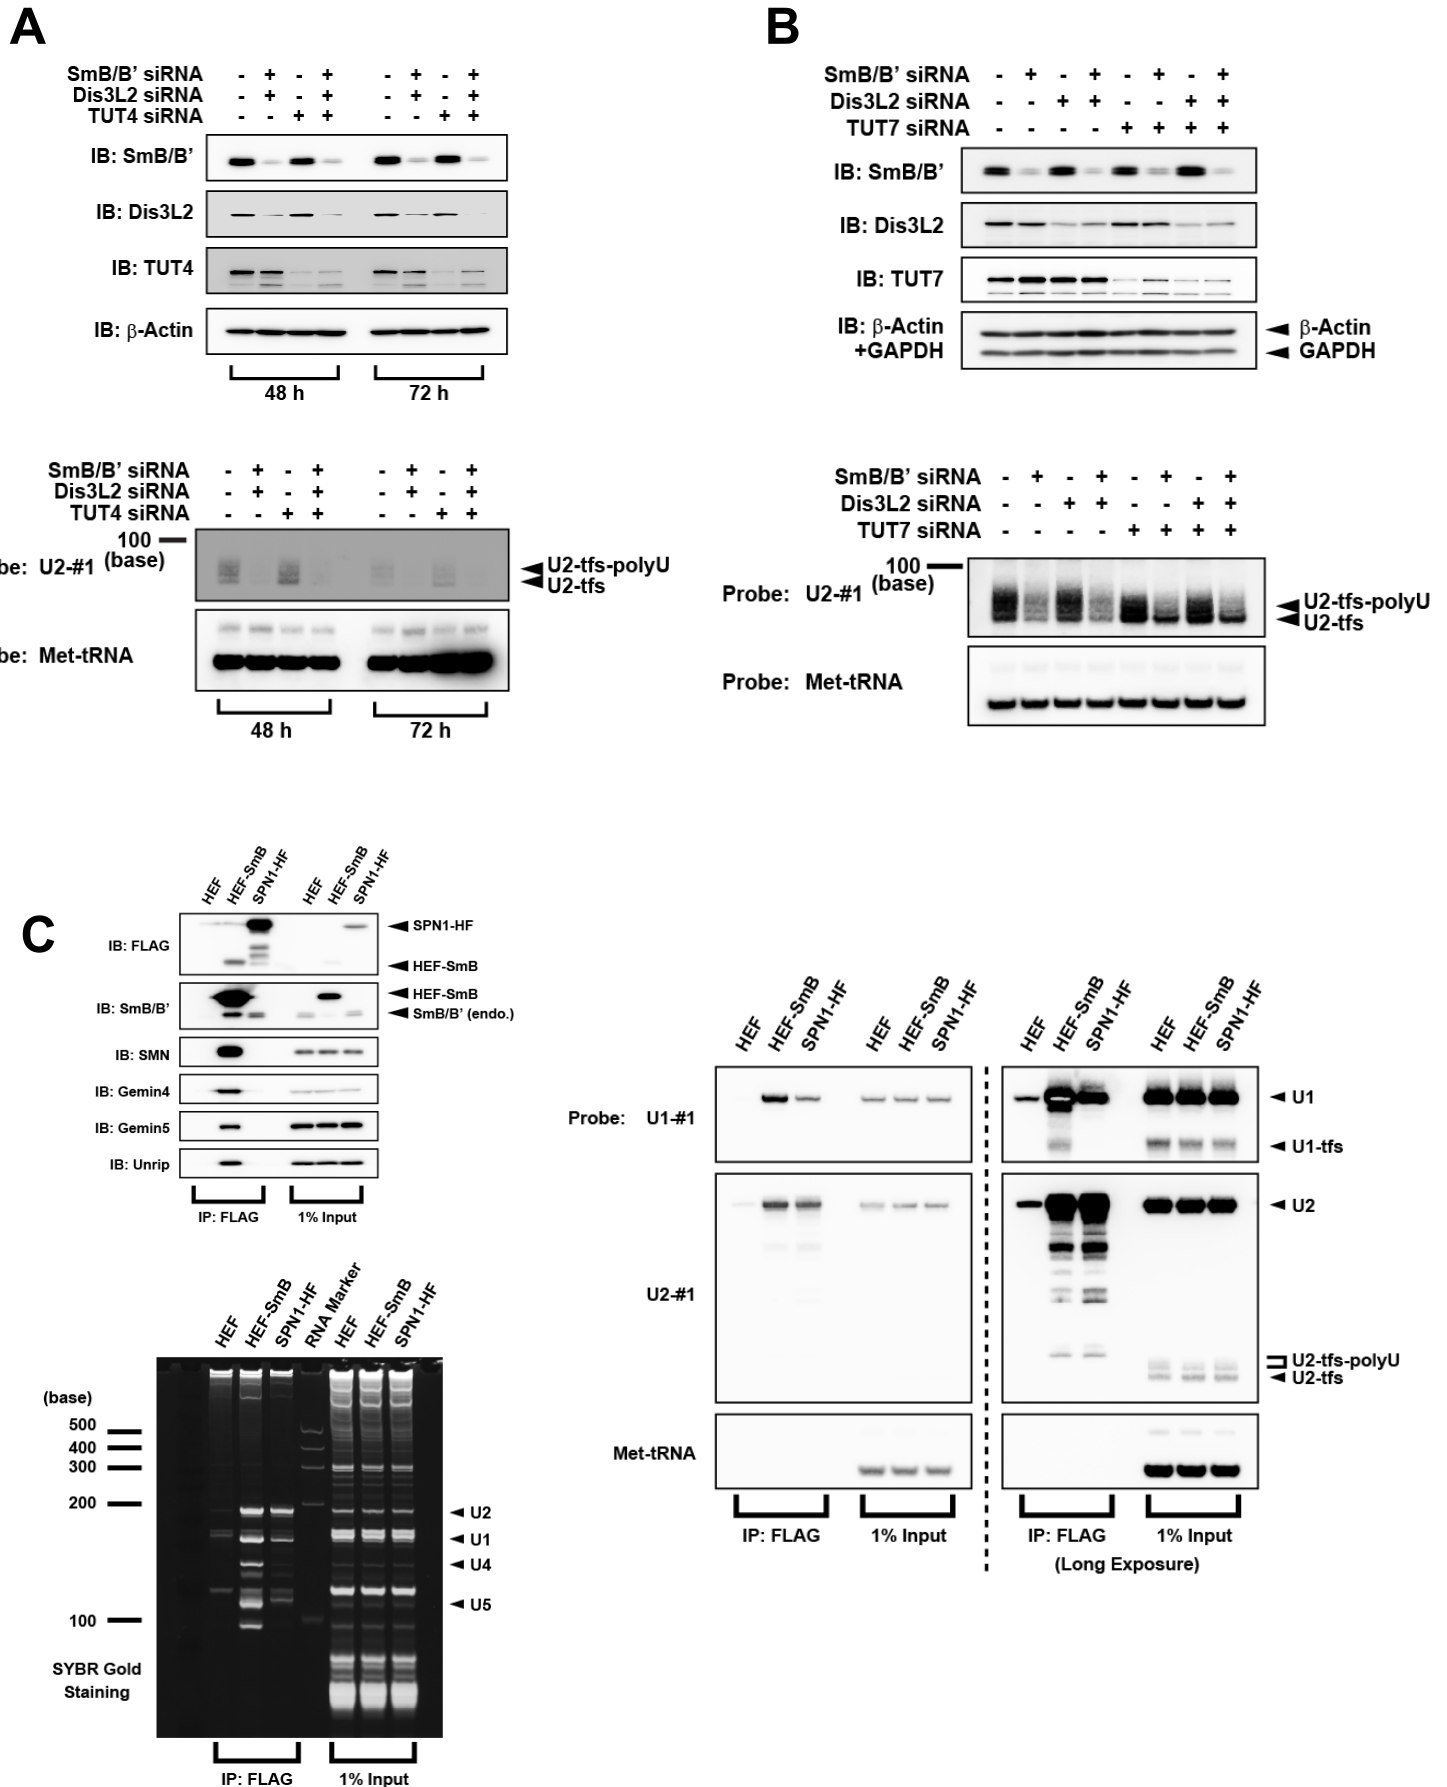

**Supplementary Table S1** Oligonucleotide for northern blotting probe

| Name     | Sequence (5' -> 3')                   | Application                          | Note                  |
|----------|---------------------------------------|--------------------------------------|-----------------------|
| y18Sn    | CCAAAGCCTGAATCCTCG[Biotin]            | Probe for y18Sn Tagged RNA detection | 3' end biotin labeled |
| Met-tRNA | [Biotin]TAGCAGAGGATGGTTTCGATCCATCGA   | Probe for Met-tRNA detection         | 5' end biotin labeled |
| U2-#1    | GATCTTAGCCAAAAGGCCGAGAAGCGAT[Biotin]  | Probe for U2 RNA detection as #1     | 3' end biotin labeled |
| U2-#2    | TTGTCCTCGGATAGAGGACGTATCAGAT[Biotin]  | Probe for U2 RNA detection as #2     | 3' end biotin labeled |
| U2-#3    | TTCCATCTCCCTGCTCCAAAAATCCAT[Biotin]   | Probe for U2 RNA detection as #3     | 3' end biotin labeled |
| U2-#4    | TACTGCAATACCAGGTTCGATGCGT[Biotin]     | Probe for U2 RNA detection as #4     | 3' end biotin labeled |
| U1-#1    | [Biotin]GTATCTCCCCTGCCAGGTAAGTAT      | Probe for U1 and U1-tfs detection    | 5' end biotin labeled |
| RAT      | [Biotin]ACGTCTAAGGGTTTCCATATAAACTCCTT | Probe for RAT Tagged RNA detection   | 5' end biotin labeled |

**Supplementary Table S2** Identification of oligonucleotides originating from U2-tfs by LC-MS-Ariadne

| _mod | Positions                 | label | 5'-ter | Sequence       | 3'-ter | MW theo | m/z theo | MWobs   | error(ppm) | m/z     | z | Apex RT | Start RT | End RT | Area     | Height   |
|------|---------------------------|-------|--------|----------------|--------|---------|----------|---------|------------|---------|---|---------|----------|--------|----------|----------|
| eac  | '1-4                      | non   | m7Gp   | (mAm)(Um)CG    | p      | 1864.22 | 931.103  | 1864.22 | -1.4       | 931.101 | 2 | 41.9    | 41.5     | 42.5   | 4.86E+05 | 3.77E+04 |
| eac  | '1-4                      | non   | m7Gp   | (mAm)(Um)CG    | >p     | 1846.21 | 922.097  | 1846.21 | -1.19      | 922.096 | 2 | 42.5    | 41.8     | 42.9   | 4.35E+05 | 3.96E+04 |
| eac  | '1-4                      | non   | m7Gp   | (Am)(Um)CG     | p      | 1850.2  | 924.095  | 1850.2  | -1.54      | 924.093 | 2 | 40.9    | 38.5     | 41.6   | 1.86E+06 | 7.19E+04 |
| eac  | '1-4                      | non   | m7Gp   | (Am)(Um)CG     | >p     | 1832.19 | 915.09   | 1832.19 | -1.06      | 915.089 | 2 | 41.7    | 41       | 41.9   | 2.14E+06 | 2.22E+05 |
| eac  | '1-4                      | non   | m7Gp   | (Am)(U)CG      | p      | 1836.19 | 917.087  | 1836.18 | -2.07      | 917.085 | 2 | 33.7    | 30.7     | 37.7   | 1.67E+06 | 1.40E+04 |
| eac  | '1-4                      | non   | m7Gp   | (Am)(U)CG      | >p     | 1818.18 | 908.082  | 1818.18 | -1.51      | 908.08  | 2 | 35.7    | 34.9     | 36.7   | 2.26E+06 | 8.21E+04 |
| eac  | '5-11                     | non   | OH-    | CUUCUCG        | p      | 2196.26 | 1097.122 | 2196.26 | -0.35      | 1097.12 | 2 | 43.7    | 43.1     | 44.1   | 1.63E+06 | 1.30E+05 |
| eac  | '5-11                     | non   | OH-    | CUUCUCG        | >p     | 2178.25 | 1088.116 | 2178.25 | -0.56      | 1088.12 | 2 | 45.1    | 44.6     | 45.5   | 6.89E+06 | 2.98E+05 |
| eac  | '12,20,82,98,106,113,119, | non   | OH-    | G              |        | 345.047 | #DIV/0!  | 0       | -1000000   |         |   |         |          |        |          |          |
| eac  | '13-19                    | non   | OH-    | CCUUUUG        | p      | 2197.24 | 1097.614 | 2197.24 | -0.52      | 1097.61 | 2 | 41.5    | 41.1     | 41.6   | 3.38E+06 | 3.84E+05 |
| eac  | '13-19                    | non   | OH-    | CCUUUUG        | >p     | 2179.23 | 1088.608 | 2179.23 | -0.61      | 1088.61 | 2 | 42      | 41.7     | 42.3   | 2.80E+06 | 3.65E+05 |
| eac  | '21-25                    | non   | OH-    | CUAAG          | p      | 1632.23 | 815.108  | 1632.23 | -0.89      | 815.107 | 2 | 42.7    | 42.4     | 43.1   | 5.07E+06 | 4.15E+05 |
| eac  | '21-25                    | non   | OH-    | CUAAG          | >p     | 1614.22 | 806.102  | 1614.22 | -1.54      | 806.101 | 2 | 44      | 43.7     | 44.4   | 9.87E+05 | 7.46E+04 |
| eac  | '26-31                    | non   | OH-    | AUCAAG         | p      | 1961.28 | 979.634  | 1961.28 | -1.01      | 979.633 | 2 | 50.5    | 50.1     | 51.1   | 1.17E+07 | 6.89E+05 |
| eac  | '26-31                    | non   | OH-    | AUCAAG         | >p     | 1943.27 | 970.629  | 1943.27 | -0.04      | 970.628 | 2 | 51.8    | 51.4     | 52.4   | 1.56E+06 | 7.79E+04 |
| eac  | '32-33,182-183            | non   | OH-    | UG             |        | 651.073 | 650.065  | 1.00728 | -998452.9  |         | 1 |         |          |        |          |          |
| eac  | '34-36                    | non   | OH-    | UAG            | p      | 998.136 | 997.129  | 998.135 | -0.44      | 997.128 | 1 | 41.9    | 41.5     | 42.1   | 1.68E+06 | 1.36E+05 |
| eac  | '34-36                    | non   | OH-    | UAG            | >p     | 980.125 | 979.118  | 1.00728 | -998972.3  |         | 1 |         |          |        |          |          |
| eac  | '37-42                    | non   | OH-    | UAUCUG         | p      | 1915.23 | 956.607  | 1915.23 | -0.65      | 956.606 | 2 | 43      | 42.6     | 43.3   | 6.39E+06 | 5.22E+05 |
| eac  | '37-42                    | non   | OH-    | UAUCUG         | >p     | 1897.22 | 947.601  | 1897.22 | -1.07      | 947.6   | 2 | 44.4    | 44       | 44.9   | 2.30E+06 | 1.36E+05 |
| eac  | '43-52                    | non   | OH-    | UUCUUAUCAG     | p      | 3161.37 | 1052.783 | 3161.38 | 1.4        | 1052.78 | 3 | 48.4    | 48.1     | 48.9   | 7.06E+06 | 4.53E+05 |
| eac  | '43-52                    | non   | OH-    | UUCUUAUCAG     | >p     | 3143.36 | 1046.78  | 3143.37 | 1.39       | 1046.78 | 3 | 48.7    | 48.2     | 48.9   | 4.19E+05 | 2.69E+04 |
| eac  | '53-63                    | non   | OH-    | UUUAAUAUCUG    | p      | 3491.41 | 1162.796 | 3491.41 | -0.38      | 1162.8  | 3 | 49.2    | 48.7     | 49.4   | 6.02E+06 | 5.53E+05 |
| eac  | '53-63                    | non   | OH-    | UUUAAUAUCUG    | >p     | 3473.4  | 1156.792 | 3473.41 | 2.24       | 1156.79 | 3 | 49.8    | 49.4     | 50.1   | 3.09E+06 | 2.14E+05 |
| eac  | '64-68                    | non   | OH-    | AUACG          | p      | 1632.23 | 815.108  | 1632.23 | -1.49      | 815.106 | 2 | 45.3    | 44.9     | 45.7   | 1.28E+06 | 5.84E+04 |
| eac  | '64-68                    | non   | OH-    | AUACG          | >p     | 1614.22 | 806.102  | 1614.22 | -0.94      | 806.102 | 2 | 48.5    | 47.9     | 48.9   | 2.54E+06 | 1.64E+05 |
| eac  | '69-79                    | non   | OH-    | UCCUCUAUCCG    | p      | 3441.42 | 1146.132 | 3441.41 | -1.2       | 1146.13 | 3 | 47.3    | 46.8     | 47.7   | 3.42E+05 | 1.98E+04 |
| eac  | '69-79                    | non   | OH-    | UCCUCUAUCCG    | >p     | 3423.41 | 1140.129 | 3423.41 | 0.28       | 1140.13 | 3 | 47.7    | 47.3     | 48.2   | 1.64E+06 | 1.14E+05 |
| eac  | '80-81,114-115,126-127    | non   | OH-    | AG             | p      | 692.111 | 691.103  | 692.109 | -2.35      | 691.102 | 1 | 42.7    | 42.2     | 43     | 7.95E+05 | 5.79E+04 |
| eac  | '80-81,114-115,126-127    | non   | OH-    | AG             | >p     | 674.1   | 673.093  | 674.099 | -1.85      | 673.091 | 1 | 47.3    | 46.7     | 47.7   | 2.09E+05 | 9.99E+03 |
| eac  | '83-97                    | non   | OH-    | ACAAUAUAUAAAUG | p      | 4830.65 | 1609.208 | 3.02183 | -999374.45 |         | 3 |         |          |        | 0.00E+00 | 0.00E+00 |

|                               |     |                      |    |         |          |         |            |         |   |      |      |      |          |          |
|-------------------------------|-----|----------------------|----|---------|----------|---------|------------|---------|---|------|------|------|----------|----------|
| eac '83-97                    | non | OH- ACAAUUAUUAUAAAUG | >p | 4812.64 | 1603.205 | 3.02183 | -999372.11 | 3       |   |      |      |      | 0.00E+00 | 0.00E+00 |
| eac u-tail                    | non | OH- ACA              | -  | 901.191 | 900.183  | 901.189 | -1.48      | 900.182 | 1 | 53.9 | 53.5 | 54.4 | 6.22E+05 | 2.72E+04 |
| eac u-tail                    | non | OH- ACAA             | -  | 1230.24 | 614.114  | 1230.24 | -2.98      | 614.112 | 2 | 53.9 | 53.3 | 54.4 | 3.60E+05 | 1.54E+04 |
| eac u-tail                    | non | OH- ACAAU            | -  | 1536.27 | 767.127  | 1536.27 | -1.39      | 767.126 | 2 | 51.1 | 50.7 | 51.4 | 2.92E+05 | 1.88E+04 |
| eac u-tail                    | non | OH- ACAAUU           | -  | 1842.29 | 920.14   | 2.01455 | -998906.5  |         | 2 |      |      |      |          |          |
| eac u-tail                    | non | OH- ACAAUUU          | -  | 2148.32 | 1073.152 | 2.01455 | -999062.27 |         | 2 |      |      |      |          |          |
| eac u-tail                    | non | OH- ACAAUUUU         | -  | 2454.34 | 1226.165 | 2.01455 | -999179.19 |         | 2 |      |      |      |          |          |
| eac u-tail                    | non | OH- ACAAUUUUU        | -  | 2760.37 | 1379.178 | 2.01455 | -999270.19 |         | 2 |      |      |      |          |          |
| eac u-tail                    | non | OH- ACAAUUUUUU       | -  | 3066.39 | 1021.124 | 3.02183 | -999014.53 |         | 3 |      |      |      |          |          |
| eac u-tail                    | non | OH- ACAAUUUUUUU      | -  | 3372.42 | 1123.133 | 3.02183 | -999103.96 |         | 3 |      |      |      |          |          |
| sum '1-4                      | non | OH- AUCG             | p  | 1303.18 | 1302.17  | 1.00728 | -999227.06 |         | 1 |      |      |      | 8.87E+06 |          |
| sum '5-11                     | non | OH- CUUCUCG          | p  | 2196.26 | 2195.25  | 1.00728 | -999541.37 |         | 1 |      |      |      | 8.51E+06 |          |
| sum '12,20,82,98,106,113,119, | non | OH- G                | p  | 363.058 | 362.051  | 1.00728 | -997225.58 |         | 1 |      |      |      | 0.00E+00 |          |
| sum '13-19                    | non | OH- CCUUUUG          | p  | 2197.24 | 2196.235 | 1.00728 | -999541.57 |         | 1 |      |      |      | 6.18E+06 |          |
| sum '21-25                    | non | OH- CUAAG            | p  | 1632.23 | 1631.222 | 1.00728 | -999382.88 |         | 1 |      |      |      | 6.06E+06 |          |
| sum '26-31                    | non | OH- AUCAAG           | p  | 1961.28 | 1960.275 | 1.00728 | -999486.42 |         | 1 |      |      |      | 1.32E+07 |          |
| sum '32-33,182-183            | non | OH- UG               | p  | 669.083 | 668.076  | 1.00728 | -998494.54 |         | 1 |      |      |      | 0.00E+00 |          |
| sum '34-36                    | non | OH- UAG              | p  | 998.136 | 997.129  | 1.00728 | -998990.84 |         | 1 |      |      |      | 1.68E+06 |          |
| sum '37-42                    | non | OH- UAUCUG           | p  | 1915.23 | 1914.22  | 1.00728 | -999474.07 |         | 1 |      |      |      | 8.69E+06 |          |
| sum '43-52                    | non | OH- UUCUUAUCAG       | p  | 3161.37 | 3160.365 | 1.00728 | -999681.38 |         | 1 |      |      |      | 7.48E+06 |          |
| sum '53-63                    | non | OH- UUUAAUAUCUG      | p  | 3491.41 | 3490.401 | 1.00728 | -999711.5  |         | 1 |      |      |      | 9.10E+06 |          |
| sum '64-68                    | non | OH- AUACG            | p  | 1632.23 | 1631.222 | 1.00728 | -999382.88 |         | 1 |      |      |      | 3.82E+06 |          |
| sum '69-79                    | non | OH- UCCUCUAUCCG      | p  | 3441.42 | 3440.411 | 1.00728 | -999707.31 |         | 1 |      |      |      | 1.98E+06 |          |
| sum '80-81,114-115,126-127    | non | OH- AG               | p  | 692.111 | 691.103  | 1.00728 | -998544.63 |         | 1 |      |      |      | 1.00E+06 |          |
| sum '83-97                    | non | OH- ACAAUUAUUAUAAAUG | p  | 4830.65 | 4829.639 | 1.00728 | -999791.48 |         | 1 |      |      |      | 0.00E+00 |          |
| sum u-tail                    | non | OH- ACAA(U)n         | p  | 1616.23 | 1615.227 | 1.00728 | -999376.78 |         | 1 |      |      |      | 1.27E+06 |          |

**Supplementary Table S3** Identification of oligonucleotides originating from U2-tfsL by LC-MS-Ariadne

| tag                                | Positions | label | 5'-ter | Sequence     | 3'-ter | MW theo | m/z theo | MW Obs  | error(ppm) | m/z      | z | Apex RT | Start RT | End RT | Area     | Height   |
|------------------------------------|-----------|-------|--------|--------------|--------|---------|----------|---------|------------|----------|---|---------|----------|--------|----------|----------|
| eac '1-4                           |           | non   | m7Gp   | (mAm)(Um)CG  | P      | 1864.22 | 931.103  | 1864.22 | -1.08      | 931.102  | 2 | 33.9    | 33.5     | 35.6   | 5.14E+05 | 2.21E+04 |
| eac '1-4                           |           | non   | m7Gp   | (mAm)(Um)CG  | >p     | 1846.21 | 922.097  | 1846.21 | -0.39      | 922.097  | 2 | 35.3    | 34.9     | 36.7   | 6.29E+05 | 2.54E+04 |
| eac '1-4                           |           | non   | m7Gp   | (Am)(Um)CG   | p      | 1850.2  | 924.095  | 1850.2  | -1.47      | 924.093  | 2 | 32.9    | 27.6     | 37.6   | 2.01E+06 | 7.72E+03 |
| eac '1-4                           |           | non   | m7Gp   | (Am)(Um)CG   | >p     | 1832.19 | 915.09   | 1832.19 | -1.18      | 915.088  | 2 | 32.9    | 30.2     | 34.3   | 2.94E+06 | 1.42E+05 |
| eac '1-4                           |           | non   | m7Gp   | (Am)(U)CG    | p      | 1836.19 | 917.087  | 1836.19 | -0.53      | 917.086  | 2 | 26      | 24.5     | 34.3   | 1.30E+06 | 5.80E+03 |
| eac '1-4                           |           | non   | m7Gp   | (Am)(U)CG    | >p     | 1818.18 | 908.082  | 1818.18 | -1.3       | 908.081  | 2 | 26.6    | 25.6     | 29.3   | 1.97E+06 | 6.56E+04 |
| eac '5-11                          |           | non   | OH-    | CUUCUCG      | p      | 2196.26 | 1097.122 | 2196.26 | -0.35      | 1097.12  | 2 | 41      | 40.6     | 42.4   | 1.46E+06 | 8.76E+04 |
| eac '5-11                          |           | non   | OH-    | CUUCUCG      | >p     | 2178.25 | 1088.116 | 2178.25 | 0.45       | 1088.12  | 2 | 42      | 41.5     | 42.6   | 4.13E+06 | 3.46E+05 |
| eac '12,20,82,98,106,113,119,125,1 |           | non   | OH-    | G            |        | 345.047 | #DIV/0!  |         | 0          | -1000000 |   |         |          |        |          |          |
| eac '13-19                         |           | non   | OH-    | CCUUUUG      | p      | 2197.24 | 1097.614 | 2197.24 | 0.36       | 1097.61  | 2 | 33.3    | 32.7     | 34.9   | 3.29E+06 | 1.71E+05 |
| eac '13-19                         |           | non   | OH-    | CCUUUUG      | >p     | 2179.23 | 1088.608 | 2179.23 | -0.5       | 1088.61  | 2 | 34.7    | 34.3     | 35.6   | 4.81E+06 | 3.40E+05 |
| eac '21-25                         |           | non   | OH-    | CUAAG        | p      | 1632.23 | 815.108  | 1632.23 | -1.86      | 815.106  | 2 | 36.8    | 35.9     | 41.5   | 4.59E+06 | 7.99E+04 |
| eac '21-25                         |           | non   | OH-    | CUAAG        | >p     | 1614.22 | 806.102  | 1614.22 | -1.23      | 806.101  | 2 | 40.8    | 40.2     | 41.8   | 1.13E+06 | 5.02E+04 |
| eac '26-31                         |           | non   | OH-    | AUCAAG       | p      | 1961.28 | 979.634  | 1961.28 | 0.11       | 979.634  | 2 | 48.5    | 48       | 50.9   | 8.40E+06 | 2.82E+05 |
| eac '26-31                         |           | non   | OH-    | AUCAAG       | >p     | 1943.27 | 970.629  | 1943.27 | -0.04      | 970.628  | 2 | 50      | 49.5     | 50.6   | 1.70E+06 | 9.61E+04 |
| eac '32-33,182-183                 |           | non   | OH-    | UG           |        | 651.073 | 650.065  | 1.00728 | -998453    |          | 1 |         |          |        |          |          |
| eac '34-36                         |           | non   | OH-    | UAG          | p      | 998.136 | 997.129  | 998.135 | -0.38      | 997.128  | 1 | 32.7    | 32.1     | 34.1   | 2.28E+06 | 8.64E+04 |
| eac '34-36                         |           | non   | OH-    | UAG          | >p     | 980.125 | 979.118  | 1.00728 | -998972    |          | 1 |         |          |        | 0.00E+00 | 0.00E+00 |
| eac '37-42                         |           | non   | OH-    | UAUCUG       | p      | 1915.23 | 956.607  | 1915.23 | -1.22      | 956.605  | 2 | 38.7    | 37.8     | 41.5   | 7.83E+06 | 1.82E+05 |
| eac '37-42                         |           | non   | OH-    | UAUCUG       | >p     | 1897.22 | 947.601  | 1897.22 | -0.04      | 947.601  | 2 | 41.5    | 41       | 41.9   | 2.56E+06 | 2.02E+05 |
| eac '43-52                         |           | non   | OH-    | UUCUUAUCAG   | p      | 3161.37 | 1052.783 | 3161.37 | 0.82       | 1052.78  | 3 | 44.9    | 43.9     | 47.4   | 8.79E+06 | 1.79E+05 |
| eac '43-52                         |           | non   | OH-    | UUCUUAUCAG   | >p     | 3143.36 | 1046.78  | 3143.36 | -0.35      | 1046.78  | 3 | 45.2    | 44.5     | 45.9   | 9.31E+05 | 3.49E+04 |
| eac '53-63                         |           | non   | OH-    | UUUAAUAUCUG  | p      | 3491.41 | 1162.796 | 3491.41 | 0.25       | 1162.8   | 3 | 47      | 46.2     | 49.4   | 5.28E+06 | 1.42E+05 |
| eac '53-63                         |           | non   | OH-    | UUUAAUAUCUG  | >p     | 3473.4  | 1156.792 | 3473.4  | 1.5        | 1156.79  | 3 | 48.4    | 47.9     | 48.8   | 3.74E+06 | 2.62E+05 |
| eac '64-68                         |           | non   | OH-    | AUACG        | p      | 1632.23 | 815.108  | 1632.23 | -0.37      | 815.107  | 2 | 41.9    | 41.5     | 45.1   | 6.47E+05 | 1.23E+04 |
| eac '64-68                         |           | non   | OH-    | AUACG        | >p     | 1614.22 | 806.102  | 1614.22 | -1.38      | 806.101  | 2 | 43.9    | 43.3     | 44.6   | 2.26E+06 | 1.06E+05 |
| eac '69-79                         |           | non   | OH-    | UCCUCUAUCCG  | p      | 3441.42 | 1146.132 | 3441.42 | 1.79       | 1146.13  | 3 | 42.4    | 42.2     | 42.9   | 1.74E+05 | 8.00E+03 |
| eac '69-79                         |           | non   | OH-    | UCCUCUAUCCG  | >p     | 3423.41 | 1140.129 | 3423.41 | 0.49       | 1140.13  | 3 | 43.2    | 42.6     | 43.7   | 1.29E+06 | 5.79E+04 |
| eac '80-81,114-115,126-127         |           | non   | OH-    | AG           | p      | 692.111 | 691.103  | 692.11  | -0.93      | 691.103  | 1 | 34.5    | 33.7     | 35.7   | 6.35E+05 | 2.42E+04 |
| eac '80-81,114-115,126-127         |           | non   | OH-    | AG           | >p     | 674.1   | 673.093  | 674.1   | -0.31      | 673.092  | 1 | 42.3    | 41.5     | 42.9   | 1.57E+05 | 7.09E+03 |
| eac '83-97                         |           | non   | OH-    | ACAAUAUAUAAA | p      | 4830.65 | 1609.208 | 3.02183 | -999374    |          | 3 |         |          |        | 0.00E+00 | 0.00E+00 |

|                                    |     |                    |    |         |          |         |         |         |   |      |      |      |          |          |
|------------------------------------|-----|--------------------|----|---------|----------|---------|---------|---------|---|------|------|------|----------|----------|
| eac '83-97                         | non | OH- ACAUAUAUUA AAA | >p | 4812.64 | 1603.205 | 3.02183 | -999372 |         | 3 |      |      |      | 0.00E+00 | 0.00E+00 |
| eac u-tail                         | non | OH- ACA            | -  | 901.191 | 900.183  | 1.00728 | -998882 |         | 1 |      |      |      | 0.00E+00 | 0.00E+00 |
| eac u-tail                         | non | OH- ACAA           | -  | 1230.24 | 614.114  | 2.01455 | -998362 |         | 2 |      |      |      | 0.00E+00 |          |
| eac u-tail                         | non | OH- ACAAU          | -  | 1536.27 | 767.127  | 2.01455 | -998689 |         | 2 |      |      |      | 0.00E+00 |          |
| eac u-tail                         | non | OH- ACAAUU         | -  | 1842.29 | 920.14   | 2.01455 | -998907 |         | 2 |      |      |      | 0.00E+00 |          |
| eac u-tail                         | non | OH- ACAAUUU        | -  | 2148.32 | 1073.152 | 2148.32 | 0.11    | 1073.15 | 2 | 48.9 | 48.6 | 49.2 | 5.22E+05 | 2.98E+04 |
| eac u-tail                         | non | OH- ACAAUUUU       | -  | 2454.34 | 1226.165 | 2454.35 | 0.54    | 1226.17 | 2 | 49.1 | 48.8 | 49.4 | 6.42E+05 | 5.31E+04 |
| eac u-tail                         | non | OH- ACAAUUUUU      | -  | 2760.37 | 1379.178 | 2760.37 | -0.64   | 1379.18 | 2 | 49.4 | 49   | 49.8 | 3.18E+05 | 1.73E+04 |
| eac u-tail                         | non | OH- ACAAUUUUUU     | -  | 3066.39 | 1021.124 | 3066.4  | 0.57    | 1021.12 | 3 | 49.7 | 49.3 | 50   | 1.45E+05 | 8.71E+03 |
| eac u-tail                         | non | OH- ACAAUUUUUUU    | -  | 3372.42 | 1123.133 | 3.02183 | -999104 |         | 3 |      |      |      | 0.00E+00 | 0.00E+00 |
| sum '1-4                           | non | OH- AUCG           | p  | 1303.18 | 1302.17  | 1.00728 | -999227 |         | 1 |      |      |      | 9.36E+06 |          |
| sum '5-11                          | non | OH- CUUCUCG        | p  | 2196.26 | 2195.25  | 1.00728 | -999541 |         | 1 |      |      |      | 5.59E+06 |          |
| sum '12,20,82,98,106,113,119,125,1 | non | OH- G              | p  | 363.058 | 362.051  | 1.00728 | -997226 |         | 1 |      |      |      | 0.00E+00 |          |
| sum '13-19                         | non | OH- CCUUUUG        | p  | 2197.24 | 2196.235 | 1.00728 | -999542 |         | 1 |      |      |      | 8.11E+06 |          |
| sum '21-25                         | non | OH- CUAAG          | p  | 1632.23 | 1631.222 | 1.00728 | -999383 |         | 1 |      |      |      | 5.72E+06 |          |
| sum '26-31                         | non | OH- AUCAAG         | p  | 1961.28 | 1960.275 | 1.00728 | -999486 |         | 1 |      |      |      | 1.01E+07 |          |
| sum '32-33,182-183                 | non | OH- UG             | p  | 669.083 | 668.076  | 1.00728 | -998495 |         | 1 |      |      |      | 0.00E+00 |          |
| sum '34-36                         | non | OH- UAG            | p  | 998.136 | 997.129  | 1.00728 | -998991 |         | 1 |      |      |      | 2.28E+06 |          |
| sum '37-42                         | non | OH- UAUCUG         | p  | 1915.23 | 1914.22  | 1.00728 | -999474 |         | 1 |      |      |      | 1.04E+07 |          |
| sum '43-52                         | non | OH- UUCUUAUCAG     | p  | 3161.37 | 3160.365 | 1.00728 | -999681 |         | 1 |      |      |      | 9.72E+06 |          |
| sum '53-63                         | non | OH- UUUAUAUCUG     | p  | 3491.41 | 3490.401 | 1.00728 | -999712 |         | 1 |      |      |      | 9.02E+06 |          |
| sum '64-68                         | non | OH- AUACG          | p  | 1632.23 | 1631.222 | 1.00728 | -999383 |         | 1 |      |      |      | 2.91E+06 |          |
| sum '69-79                         | non | OH- UCCUCUAUCCG    | p  | 3441.42 | 3440.411 | 1.00728 | -999707 |         | 1 |      |      |      | 1.46E+06 |          |
| sum '80-81,114-115,126-127         | non | OH- AG             | p  | 692.111 | 691.103  | 1.00728 | -998545 |         | 1 |      |      |      | 7.93E+05 |          |
| sum '83-97                         | non | OH- ACAUAUAUUA AAA | p  | 4830.65 | 4829.639 | 1.00728 | -999791 |         | 1 |      |      |      | 0.00E+00 |          |
| sum u-tail                         | non | OH- ACAA(U)n       | p  | 1616.23 | 1615.227 | 1.00728 | -999377 |         | 1 |      |      |      | 1.63E+06 |          |

## Supplementary Table S4 Oligonucleotides for construction

Sequence (5' -> 3')

|        |                                                                  |
|--------|------------------------------------------------------------------|
| HIW497 | GAAGGATCCCCCAGCCCTCAGCGATGGGATTTTCAG                             |
| HIW498 | CAACTCGAGGAATTACTACGCAGCCATAAAAAAGGATG                           |
| HIW517 | TCCAGATCTGCCTTCGCGCCCGCCGTCAC                                    |
| HIW538 | GGAAGATCTATCGCTTCTCGCGAGGATTCAGGCTTTGGATCGATATCGCTTCTCGGCCTTTTGG |
| HIW553 | GCCCCGCCCTTTCACAGAGG                                             |
| HIW554 | TCGAAATGAAAGCCCGGGAAC                                            |
| HIW555 | CCCCAGCCTCGCTCCTTGC                                              |
| HIW556 | GATGAGAGTGGGACGGTGACG                                            |
| HIW557 | ACGTTGTATCCCCGGAGGGGGTG                                          |
| HIW558 | GGGAGGTGAGAGACGGTAGCAC                                           |
| HIW559 | GAAGGATCCGCTCTCCGCCGACAGGTCTCTTC                                 |
| HIW560 | CAACTCGAGGGTCGCCACCCACTCGACTG                                    |
| HIW602 | GTCCTCGGATAGAGGACGTATCAG                                         |
| HIW603 | CCTCCGGGGATAACAACGTGTTTCC                                        |
| HIW604 | CCATTTAATATATTGTCCTCGGATAGAG                                     |
| HIW605 | GAGCAGGGAGATGGAATAGGAG                                           |
| HIW606 | CTGCTCCAAAAATCCATTTAATATATTGTCCTC                                |
| HIW607 | ACGCATCGACCTGGTATTGCAG                                           |
| HIW608 | GGAGTGGACGGAGCAAGCTC                                             |
| HIW394 | CGATTTTTTTG                                                      |
| HIW395 | AATTCAAAAAAAT                                                    |
| HIW561 | GAAGGATCCATGAGCCATCCTGACTACAG                                    |
| HIW562 | CAACCCGGGCGCTGGTGCTTGAGTCCTC                                     |
| HIW591 | CAACCGCCCGAGACCTCAATGATGCCCTCTCCTG                               |
| HIW592 | CAGGAGAGGGCATCATTGAGGTCTCGGGCGGTTG                               |

**Supplementary Table S5** Antibodies

| Name (clone name)                    | Host / Class        | Dilution | Supplier                  | Product code |
|--------------------------------------|---------------------|----------|---------------------------|--------------|
| Anti SmB/B' (clone Y12)              | mouse / monoclonal  | 1:1000   | Thermo Fisher Scientific  | MS-450-P     |
| Anti Dis3L2                          | rabbit / polyclonal | 1:1000   | Novus Biologicals         | NBP1-84740   |
| Anti b-Actin (clone AC-15)           | mouse / monoclonal  | 1:2000   | Santa Cruz Biotechnology  | sc-69879     |
| Anti GAPDH (clone 6C5)               | mouse / monoclonal  | 1:10000  | Thermo Fisher Scientific  | AM4300       |
| Anti TUT7                            | rabbit / polyclonal | 1:1000   | Sigma-Aldrich             | HPA020620    |
| Anti TUT4                            | rabbit / polyclonal | 1:1000   | Proteintech               | 18980-1-AP   |
| Anti FLAG (clone M2)                 | mouse / monoclonal  | 1:10000  | Sigma-Aldrich             | F3165        |
| Anti SMN (clone 2B1)                 | mouse / monoclonal  | 1:1000   | Santa Cruz Biotechnology  | sc-32313     |
| Anti-mouse IgG, HRP-linked Antibody  | horse / polyclonal  | 1:2000   | Cell Signaling Technology | #7076        |
| Anti-rabbit IgG, HRP-linked Antibody | goat / polyclonal   | 1:2000   | Cell Signaling Technology | #7074        |



**Supplementary Table S6** siRNA information

| Name                                  | Product Type          | Sequence (anti-sense)                          | Sequence (sense)            | Target RNA | Note                                      |
|---------------------------------------|-----------------------|------------------------------------------------|-----------------------------|------------|-------------------------------------------|
| SmB/B' (sc)                           | Stealth siRNA         | AUAAGCCAGUAUCUUUGGGAGGGUC                      | GACCCUCCCAAAGAUACUGGCUUUAU  | –          | Used in our previous report / main figure |
| SmB/B' (si)                           | Stealth siRNA         | AUACCAGUAUCUUUGGGAGGAGGUC                      | GACCUCCUCCCAAAGAUACUGGUUUAU | NM_003091  | Used in our previous report / main figure |
| Dis3L2 (sc)                           | Stealth siRNA         | UUAUCACAUCCUUCUAACCUCGCGG                      | CCGCGAGGUUAGAAGGAUGUGAUAA   | –          | Used in main figure                       |
| Dis3L2 (si)                           | Stealth siRNA         | UUAACUACCUUCCAAUGCUCUCGG                       | CCGAGGAGCAUUGGAAGGUAGUUAA   | NM_152383  | Used in main figure                       |
| TUT7 (sc)                             | Stealth siRNA         | UGGAUACGUAACCUCAACGUUUCUG                      | CAGAAACGUUGAGGUUACGUAUCCA   | –          | Used in main figure                       |
| TUT7 (si)                             | Stealth siRNA         | UGGCAAUGCCAACUGCAUUUAUCUG                      | CAGAUAAAUGCAGUUGGCAUUGCCA   | NM_024617  | Used in main figure                       |
| Silencer Select Negative Control No.1 | Silencer Select siRNA | not specified (Thermo : product code #4390843) |                             | –          | Used in supplementary figure              |
| SmB/B' siRNA                          | Silencer Select siRNA | UCGAGCAAUACCAGUAUCUtt                          | AGAUACUGGUUUGCUCGAtt        | NM_003091  | Used in supplementary figure              |
| Dis3L2 siRNA                          | Silencer Select siRNA | UAUCUGAUUCAUACGCAGCtt                          | GCUGCGUAUGAAUCAGAUAtt       | NM_152383  | Used in supplementary figure              |
| TUT7 siRNA                            | Silencer Select siRNA | AGUCGUCUUACAGUUCUGCag                          | GCAGAACUGUAAGACGACUtt       | NM_024617  | Used in supplementary figure              |
| TUT4 siRNA                            | Silencer Select siRNA | UAUCACGAAAUCCAAAUCcat                          | GGAUUUGGAUUUCGUGAUAtt       | NM_015269  | Used in supplementary figure              |

\* lowercase in silencer select sequence means deoxyribonucleotide
